# Supplementary material for: Preclinical Evaluation of Bioactive Scaffolds for the Treatment of Mandibular Critical-Sized Bone Defects: A Systematic Review
Source: MDPI journal article supplement (doi:10.3390/app13084668), 2023-04-07
Supplement: s1 [file s1]

| No | Year | Authors                 | Species   | Defect model | Carrier                                          | Growth factors | Cell therapy            | Evaluation method                                        |
|----|------|-------------------------|-----------|--------------|--------------------------------------------------|----------------|-------------------------|----------------------------------------------------------|
| 1  | 1999 | Toriumi et al. [46]     | Dogs      | Body         | PLGA                                             | BMP-2          |                         | Histology, radiography, immunohistochemistry             |
| 2  | 2001 | Schliephake et al. [64] | Sheep     | Body         | Collagen                                         |                |                         | Histology, immunohistochemistry, SEM                     |
| 3  | 2001 | Terheyden et al. [109]  | Mini-pigs | Angle        | Xenogenic graft                                  | rHOP-1         |                         | Fluorescence microscopy, SPECT                           |
| 4  | 2001 | Seto et al. [70]        | nHPs      | Body         | PLGA                                             | BMP-2          | BMSCs                   | Histology, radiography                                   |
| 5  | 2002 | Marukawa et al. [66]    | nHPs      | Body         | PLGA                                             | BMP-2          |                         | Histology, radiography                                   |
| 6  | 2003 | Arosarena et al. [54]   | Rats      | Body         | Collagen, HAP                                    |                |                         | Histology, fluorescence microscopy                       |
| 7  | 2003 | Park et al. [61]        | Rats      | Body         |                                                  | BMP-2          | BMSCs                   | Histology, radiography, immunohistochemistry             |
| 8  | 2004 | Abu-Serriah et al. [72] | Sheep     | Body         | Collagen                                         | BMP-7          |                         | Histology, immunohistochemistry, fluorescence microscopy |
| 9  | 2004 | Kontaxis et al. [74]    | Sheep     | Body         | Collagen                                         | BMP-7          |                         | Biomechanical testing                                    |
| 10 | 2004 | Yamada et al. [67]      | Dogs      | Body         | Autologous                                       |                | MSCs                    | Histology, radiography, immunohistochemistry             |
| 11 | 2004 | Wang et al. [63]        | Mini-pigs | Body         | Collagen                                         | rHOP-1         |                         | Histology, radiography, biomechanical testing            |
| 12 | 2005 | Arosarena et al. [52]   | Rats      | Body         | Hyaluronic acid-based, collagen/HAP/ $\beta$ TCP | BMP-2          |                         | Histology, immunohistochemistry                          |
| 13 | 2005 | Arosarena et al. [53]   | Rats      | Body         | Hyaluronic acid-based                            | BMP-2 + BMP-4  |                         | Histology, fluorescence microscopy                       |
| 14 | 2005 | Abu-Serriah et al. [73] | Sheep     | Body         | Collagen                                         | rHOP-1         |                         | Histology, immunohistochemistry, biomechanical testing   |
| 15 | 2005 | Srouji et al. [91]      | Rats      | Ramus        |                                                  | TGF1+IGF-1     |                         | Histology, radiography                                   |
| 16 | 2006 | Jiang et al. [29]       | Rabbits   | Body         |                                                  | BMP-4          | BMSCs                   | Histology                                                |
| 17 | 2006 | Eckholm et al. [89]     | Sheep     | Body         | $\beta$ TCP-based, PCL                           |                |                         | Histology, radiography                                   |
| 18 | 2006 | Boyne et al. [55]       | nHPs      | Body         | Collagen                                         | BMP-2          |                         | Histology                                                |
| 19 | 2006 | Seto et al. [68]        | nHPs      | Body         | Collagen                                         | BMP-2          | BMSCs                   | Histology, radiography                                   |
| 20 | 2006 | Wu et al. [31]          | Dogs      | Body         | $\beta$ TCP-based                                |                | BMSCs                   | Histology                                                |
| 21 | 2006 | Mankani et al. [42]     | Mice      | Body         | HAP/ $\beta$ TCP                                 |                | BMSCs                   | Histology, biomechanical testing                         |
| 22 | 2007 | He et al. [37]          | Dogs      | Body         | $\beta$ TCP-based                                |                | BMSCs                   | Histology, radiography, SEM, biomechanical testing       |
| 23 | 2007 | Yuan et al. [38]        | Dogs      | Body         | $\beta$ TCP-based                                |                | BMSCs                   | Histology, radiography, SEM, biomechanical testing       |
| 24 | 2007 | Issa et al. [87]        | Rats      | Body         | Chitosan-based                                   | BMP-2          |                         | Histology                                                |
| 25 | 2008 | Springer et al. [58]    | Rats      | Body         |                                                  | BMP-2 + FGF    |                         | Histology                                                |
| 26 | 2008 | Schliephake et al. [60] | Rats      | Ramus        | PLA                                              | BMP-2          |                         | Histology, radiography, immunohistochemistry             |
| 27 | 2009 | Zhang et al. [108]      | Rabbits   | Ramus        | PLGA                                             | BMP-2          |                         | SEM                                                      |
| 28 | 2010 | Zhao et al. [30]        | Rats      | Ramus        | $\beta$ TCP-based                                | BMP-2          | BMSCs                   | Micro-CT, histology, immunohistochemistry                |
| 29 | 2010 | Gallejo et al. [83]     | Rats      | Body         | Xenogenic graft                                  |                | Osteoblasts /osteocytes | Micro-CT, histology, immunohistochemistry, SEM           |
| 30 | 2010 | Li et al. [28]          | Rabbits   | Body         | HAP                                              | BMP-7          | MSCs                    | Histology, radiography, biomechanical testing            |
| 31 | 2010 | Jégoux et al. [90]      | Dogs      | Body         | Collagen, HAP/ $\beta$ TCP                       |                |                         | Micro-CT, histology, SEM                                 |

|    |      |                             |           |              |                            |                |                         |                                                                             |
|----|------|-----------------------------|-----------|--------------|----------------------------|----------------|-------------------------|-----------------------------------------------------------------------------|
| 32 | 2012 | Guo et al. [23]             | Rabbits   | Body + Angle | HAP                        | BMP-2          | BMSCs                   | Histology, radiography, RT- PCR                                             |
| 33 | 2012 | Busuttill Naudi et al. [75] | Rabbits   | Body         | $\beta$ -TCP-based         | BMP-7          | MSCs                    | Histology, radiography                                                      |
| 34 | 2012 | Herford et al. [45]         | nHPs      | Body         | Collagen, HAP/ $\beta$ TCP | BMP-2          |                         | Micro-CT, histology                                                         |
| 35 | 2012 | Hussein et al. [88]         | Dogs      | Body         | Collagen                   | BMP-2 + VEGF   |                         | Micro-CT, immunohistochemistry, RT-PCR                                      |
| 36 | 2013 | DeConde et al. [51]         | Rats      | Body         | PLGA                       | BMP-2          |                         | Micro-CT, histology                                                         |
| 37 | 2013 | Streckbein et al. [62]      | Rats      | Body         |                            |                | ADSCs                   | Micro-CT, histology, radiography                                            |
| 38 | 2013 | Su et al. [25]              | Rabbits   | Body         |                            | BMP-2 + FGF    | BMSCs                   | Histology, radiography                                                      |
| 39 | 2013 | Liu et al. [32]             | Rabbits   | Body         | PLA                        |                |                         | Histology, radiography                                                      |
| 40 | 2013 | Kim et al. [79]             | Rabbits   | Body         | Collagen                   | BMP-2          | MSCs                    | Micro-CT, histology, radiography                                            |
| 41 | 2013 | Khojasteh et al. [82]       | Dogs      | Body         | PCL/ $\beta$ TCP           |                | MSCs                    | Histology, SEM                                                              |
| 42 | 2014 | Liu et al. [24]             | Rats      | Ramus        | Collagen                   | SDF-1 $\alpha$ |                         | Micro-CT, biomechanical testing                                             |
| 43 | 2014 | Fan et al. [49]             | Rats      | Body         | Chitosan-based             | BMP-2          | ADSCs                   | Micro-CT, histology, immunohistochemistry                                   |
| 44 | 2014 | Liu et al. [27]             | Rabbits   | Body         | PCL/HAP                    | BMP-2          |                         | Micro-CT, histology                                                         |
| 45 | 2014 | Alfotawei et al. [71]       | Rabbits   | Body         | $\beta$ TCP-based          | BMP-7          | BMSCs                   | Histology, radiography, CBCT                                                |
| 46 | 2014 | Yun et al. [78]             | Dogs      | Body         | HAP/ $\beta$ TCP           | BMP-2          |                         | Micro-CT, histology                                                         |
| 47 | 2014 | Behnia et al. [81]          | Dogs      | Body         | Collagen                   |                | SHED                    | Histology                                                                   |
| 48 | 2015 | Jin et al. [77]             | Rats      | Body         | Hyaluronic acid-based      | BMP-2          | BMSCs                   | Micro-CT, histology                                                         |
| 49 | 2015 | Gallego et al. [84]         | Sheep     | Body         | Autologous                 |                | BMSCs                   | Micro-CT, histology                                                         |
| 50 | 2015 | Lee et al. [40]             | Rats      | Body         | PLGA                       | BMP-2          | ADSCs                   | Micro-CT                                                                    |
| 51 | 2015 | Lohse et al. [56]           | Rats      | Ramus        | PDLLA/CaCO3                | BMP-2          |                         | Histology, radiography                                                      |
| 52 | 2015 | Konopnicki et al. [48]      | Mini-pigs | Body         | $\beta$ TCP-based, PCL     |                | BMSCs                   | Histology, radiography, immunohistochemistry                                |
| 53 | 2016 | Das et al. [50]             | Rats      | Body         | PLGA                       | BMP-6 + VEGF   | MSCs                    | Micro-CT, histology, immunohistochemistry                                   |
| 54 | 2016 | Zhang et al. [22]           | Rabbits   | Body         | Collagen                   | BMP-2          |                         | Histology, radiography                                                      |
| 55 | 2016 | Song et al. [100]           | Rabbits   | Body         | Chitosan/collagen          | BMP-2          | MSCs                    | Micro-CT, histology                                                         |
| 56 | 2016 | Tee et al. [43]             | Swine     | Body         | $\beta$ TCP-based, PLGA    | BMP-2 + VEGF   | BMSCs                   | Micro-CT, histology, radiography                                            |
| 57 | 2017 | Moser et al. [57]           | Rats      | Body         | PDLLA/CaCO3                | BMP-2          |                         | Histology, immunohistochemistry, RT-PCR                                     |
| 58 | 2017 | Poudel et al. [80]          | Rats      | Body         | Collagen                   | FGF            | BMSCs                   | Micro-CT, histology, RT-PCR                                                 |
| 59 | 2017 | Wang et al. [33]            | Rabbits   | Body         | PLGA                       | Insulin        | BMSCs                   | Micro-CT, histology                                                         |
| 60 | 2017 | Çakır-Özkan et al. [92]     | Mini-pigs | Body         | PLLA/PEG                   | BMP-2 + VEGF   |                         | Histology, radiography, immunohistochemistry, RT-PCR, biomechanical testing |
| 61 | 2017 | Fan et al. [41]             | Rats      | Body         | PLGA                       | BMP-2+phenamil | MSCs                    | Micro-CT, histology, immunohistochemistry                                   |
| 62 | 2017 | Maglione et al. [99]        | Rats      | Body         | Chitosan                   |                | ADSCs                   | Micro-CT, histology                                                         |
| 76 | 2017 | Ozaki et al. [65]           | Rats      | Angle        | Collagen                   | rHOP-1         | Osteoblasts /osteocytes | Micro-CT, histology, radiography                                            |
| 63 | 2018 | Lopez et al. [44]           | Rabbits   | Body         | $\beta$ TCP-based          |                |                         | Micro-CT, histology                                                         |
| 64 | 2018 | Wang et al. [95]            | Rats      | Body         |                            | BMP-2          | BMSCs                   | Micro-CT, histology                                                         |
| 65 | 2018 | Nuntanaranont et al. [98]   | Rabbits   | Body         | PCL/ $\beta$ TCP           |                | BMSCs                   | Histology, radiography                                                      |

|    |      |                                 |           |              |                                    |              |       |                                                                               |
|----|------|---------------------------------|-----------|--------------|------------------------------------|--------------|-------|-------------------------------------------------------------------------------|
| 66 | 2018 | Cui et al. [34]                 | Mini-pigs | Body         | Autologous                         |              | BMSCs | Histology, radiography                                                        |
| 67 | 2018 | Khojasteh et al. [97]           | Dogs      | Body         | Collagen                           | BMP-2        |       | Histology, radiography, immunohistochemistry                                  |
| 68 | 2019 | Tateno et al. [39]              | Rats      | Body         | Collagen                           |              | DFAT  | Micro-CT, histology, radiography                                              |
| 69 | 2019 | Lopez et al. [69]               | Rabbits   | Ramus        | $\beta$ TCP-based                  | Dipyridamole |       | Micro-CT, histology                                                           |
| 70 | 2019 | Deng et al. [76]                | Rabbits   | Body         | Chitosan-based                     | BMP-2        |       | Micro-CT, histology, immunohistochemistry                                     |
| 71 | 2019 | Stigler et al. [94]             | Sheep     | Body         | $\beta$ TCP-based, PTFE            |              | MSCs  | Histology, radiography                                                        |
| 72 | 2019 | Carlisle et al. [93]            | Mini-pigs | Body         | $\beta$ TCP-based, PU              | BMP-2        |       | Micro-CT, radiography, immunohistochemistry                                   |
| 73 | 2019 | Li et al. [86]                  | Dogs      | Angle        | HAP/ $\beta$ TCP-based             | BMP-2        |       | Micro-CT, histology, immunohistochemistry, SEM                                |
| 74 | 2019 | Helal et al. [96]               | Dogs      | Body         | PLA/HAP/ $\beta$ TCP               |              |       | Histology, immunohistochemistry, CBCT                                         |
| 75 | 2019 | Yahia et al. [59]               | Rabbits   | Ramus        | PCL, Chitosan-based                |              |       | Histology, SEM, CBCT                                                          |
| 77 | 2020 | Park et al. [85]                | Rabbits   | Body         | PCL/ $\beta$ TCP                   |              | MSCs  | Micro-CT, histology                                                           |
| 78 | 2020 | Witek et al. [47]               | Sheep     | Body         | PLGA                               | L-PRF        |       | Immunohistochemistry                                                          |
| 79 | 2020 | Probst et al. [35]              | Mini-pigs | Body + Angle | $\beta$ TCP-based, PLGA            |              | ADSCs | Micro-CT, histology, radiography, immunohistochemistry                        |
| 80 | 2020 | Gutiérrez-Quintero et al. [26]  | Rabbits   | Body         | HAP/PLGA                           |              | DPSCs | Histology, radiography                                                        |
| 81 | 2021 | Xu et al. [105]                 | Rabbits   | Body         | $\beta$ TCP-based                  | BMP-2 + FGF  | BMSCs | Histology, radiography                                                        |
| 82 | 2021 | Lee et al. [106]                | Dogs      | Body         | PCL/ $\beta$ TCP                   |              | ADSCs | Histology, radiography, immunohistochemistry, RT-PCR                          |
| 83 | 2021 | Park et al. [107]               | Dogs      | Body         | PCL/ $\beta$ TCP                   | BMP-2        |       | Micro-CT, histology, SEM                                                      |
| 84 | 2021 | Cao et al. [103]                | nHPs      | Body         | PLGA/ $\beta$ TCP                  | BMP-2        |       | Histology, radiography, biomechanical testing                                 |
| 85 | 2021 | Barrientos-Lezcano et al. [104] | Rats      | Angle        | HAP                                |              | ADSCs | Histology                                                                     |
| 86 | 2022 | Mao et al. [101]                | Rabbits   | Body         | HAP/Collagen                       | CGF          | MSCs  | Micro-CT, histology, immunohistochemistry                                     |
| 87 | 2022 | Zhu et al. [102]                | Rabbits   | Body         | HAP/Collagen                       | CGF          |       | Micro-CT, histology, radiography, immunohistochemistry, biomechanical testing |
| 88 | 2022 | Stevanovic et al. [36]          | Swine     | Body         | HAP/PLGA, HAP/PEI, Xenogenic graft |              |       | Histology, immunohistochemistry, CBCT                                         |
